# Supplementary material
Source: publisher figshare collection journal article supplement (https://acs.figshare.com/ndownloader/files/4404424)
Supplement: Supplementary file 1 [file 4404424]

# Ionothermal Synthesis of Layered Zirconium Phosphates and Their Tribological Properties in Mineral Oil

*Lei Liu<sup>a</sup>, Zhao-Feng Chen<sup>a</sup>, Hai-Bo Wei<sup>a</sup>, Yang Li<sup>b\*</sup>, Yu-Chuan Fu<sup>a</sup>, Hong Xu<sup>a</sup>, Jin-Ping Li<sup>a</sup>,*

*Alexandra M Z Slawin<sup>b</sup>, and Jin-Xiang Dong<sup>a\*</sup>*

<sup>a</sup> Research Institute of Special Chemicals, Taiyuan University of Technology, Taiyuan, 030024 (China)

<sup>b</sup> School of Chemistry, University of St Andrews, KY169ST(U.K.)

Table S1 Details of the synthetic conditions for zirconium phosphate materials<sup>a</sup>

| HF | ZrOCl <sub>2</sub> | H <sub>3</sub> PO <sub>4</sub> | DES | DMP <sup>b</sup> | Conditions   | Phase                   |
|----|--------------------|--------------------------------|-----|------------------|--------------|-------------------------|
| 1  | 1                  | 1                              | 26  | 0                | 3days, 180°C | amorphous               |
| 2  | 1                  | 2                              | 26  | 0                | 3days, 180°C | α-ZrP                   |
| 2  | 1                  | 3                              | 26  | 0                | 3days, 150°C | α-ZrP                   |
| 2  | 1                  | 2                              | 26  | 1                | 3days, 180°C | ZrPO <sub>4</sub> -DES8 |
| 2  | 1                  | 2                              | 26  | 3                | 3days, 180°C | ZrPO <sub>4</sub> -DES8 |
| 2  | 1                  | 2                              | 26  | 5                | 3days, 180°C | ZrPO <sub>4</sub> -DES8 |

<sup>a</sup> Initial reaction compositions with molar ratio. <sup>b</sup> 1,4-dimethylpiperazine

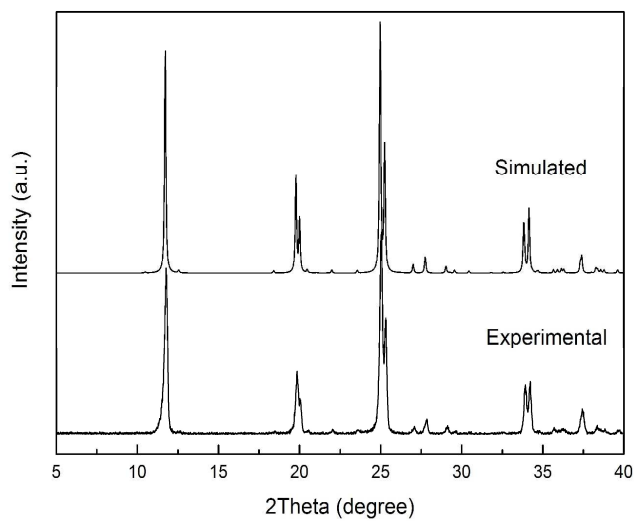

**Figure S1** Experimental and simulated X-ray power diffraction patterns for  $\alpha$ -ZrP phase

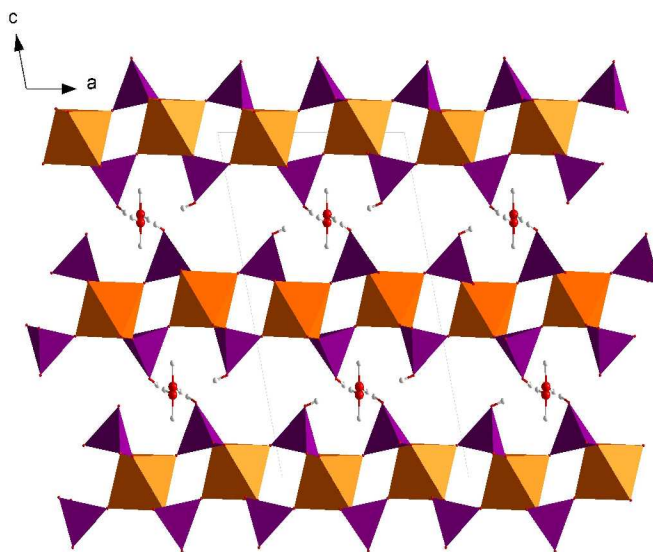

**Figure S2** The layered structure of  $\alpha$ -ZrP viewed parallel to the  $b$  axis  
( $\text{PO}_4$ : purple,  $\text{ZrO}_6$ : orange, water: red).

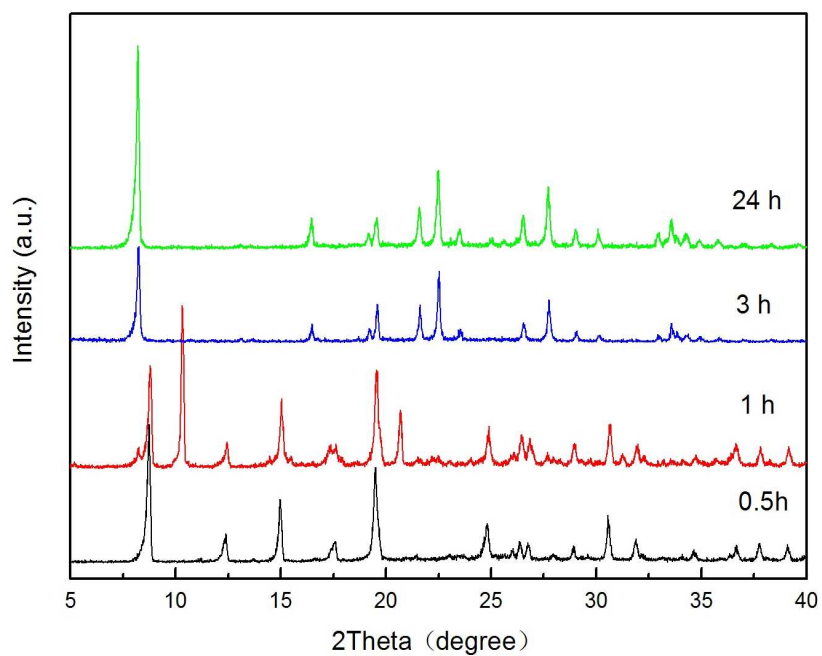

**Figure S3** XRD patterns of the samples from different crystallization time

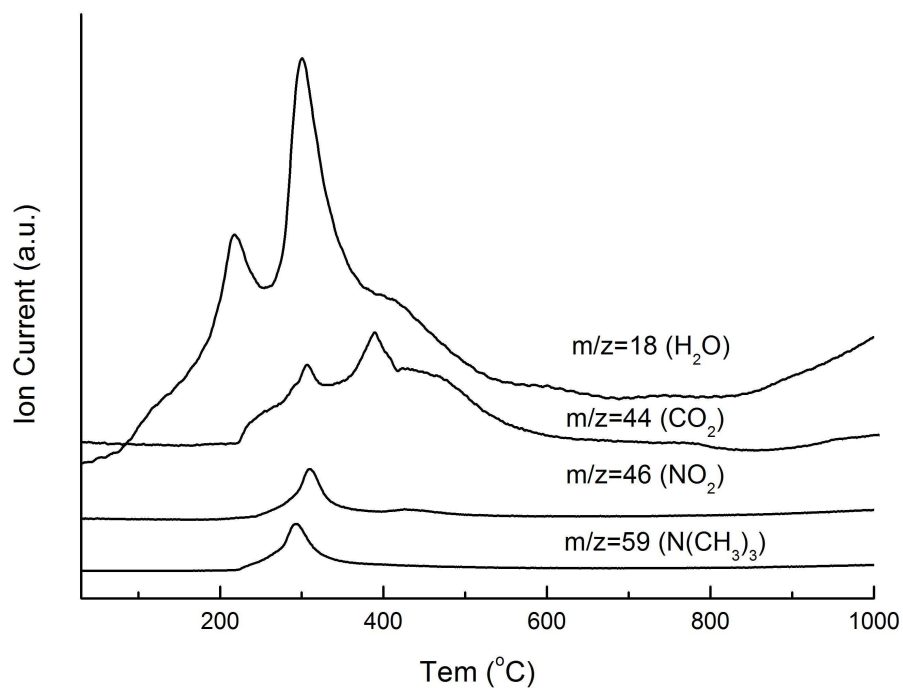

**Figure S4** Mass spectrum of the evolved gases of the  $\text{ZrPO}_4\text{-DES8}$  in the temperature range 30-1000°C.

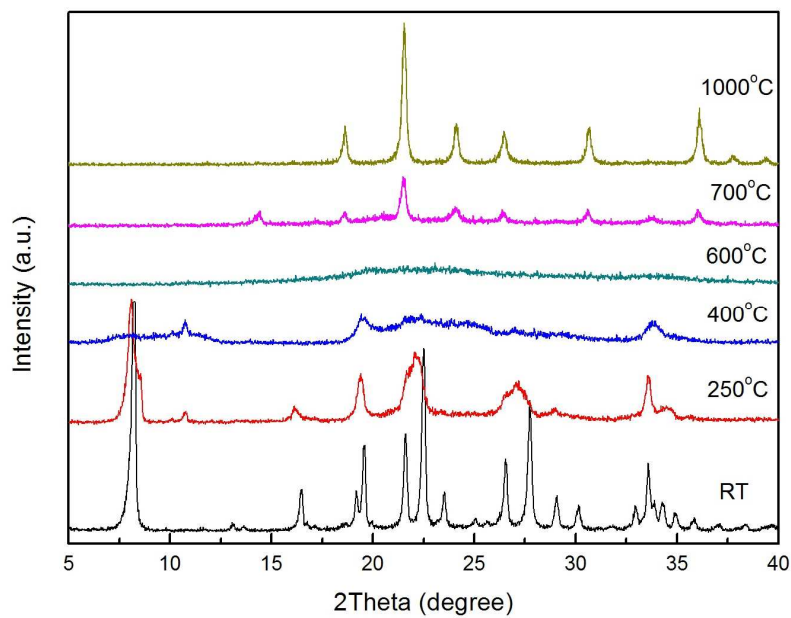

**Figure S5** Powder XRD patterns of  $\text{ZrPO}_4\text{-DES8}$  after calcination at different temperature

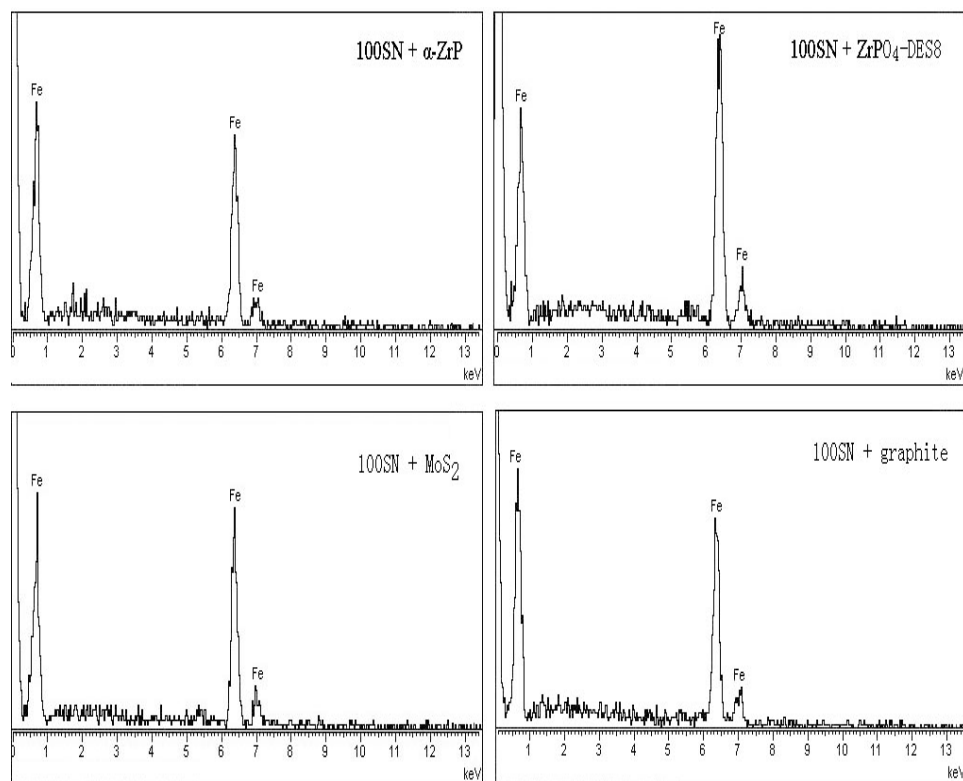

**Figure S6** EDS of the wear scar surface lubricated with 100SN oil + different layered materials
